# Supplementary material for: An arginine functionalized magnetic nano-sorbent for simultaneous removal of three metal ions from water samples
Source: Royal Society of Chemistry journal article supplement (doi:10.1039/c7ra09705k), 2017-01-01
Supplement: c7ra09705k1.pdf [file c7ra09705k1.pdf]

## Supplementary/Supporting Information for

### Arginine functionalized magnetic nano-sorbent for simultaneous removal of three metal ions from water samples

Renu Verma<sup>1</sup>, Anupama Asthana<sup>1</sup>, Ajaya Kumar Singh<sup>1,\*</sup>, Surendra Prasad<sup>2,\*</sup>

<sup>1</sup>Department of Chemistry, Government V.Y.T. Postgraduate Autonomous College, Durg, Chhattisgarh 491001, India

<sup>2</sup>School of Biological and Chemical Sciences, Faculty of Science, Technology and Environment, The University of the South Pacific, Private Mail Bag, Suva, Fiji

Corresponding Authors:

\*1Tel: +91-9406207572; fax: +91-788-2211688

\*2Tel.: +679-3232416; fax: +679-2321512

E-mail addresses: [prasad\\_su@usp.ac.fj](mailto:prasad_su@usp.ac.fj) (S. Prasad)

[ajayaksingh\\_au@yahoo.co.in](mailto:ajayaksingh_au@yahoo.co.in) (A.K. Singh)

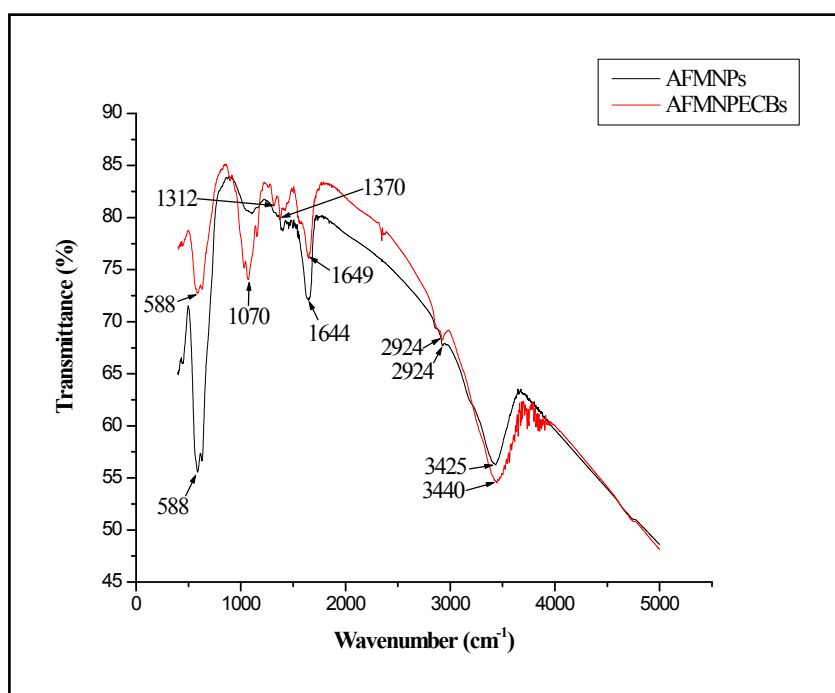

**Fig. 1S.** FTIR spectra of arginine functionalized magnetic nanoparticles and arginine functionalized magnetic nanoparticle entrapped chitosan beads.

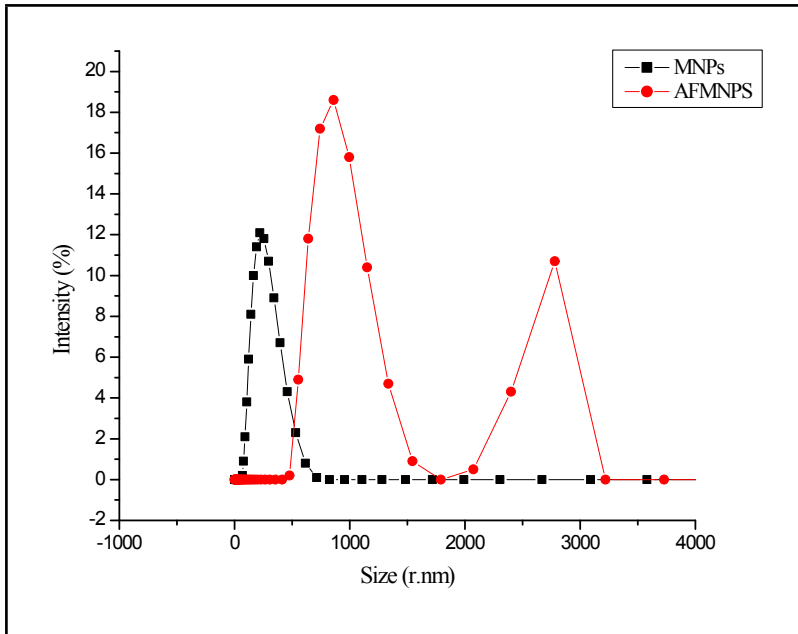

**Fig. 2S.** dynamic light scattering (DLS) analysis for the size distribution of MNPs and AFMNPs.

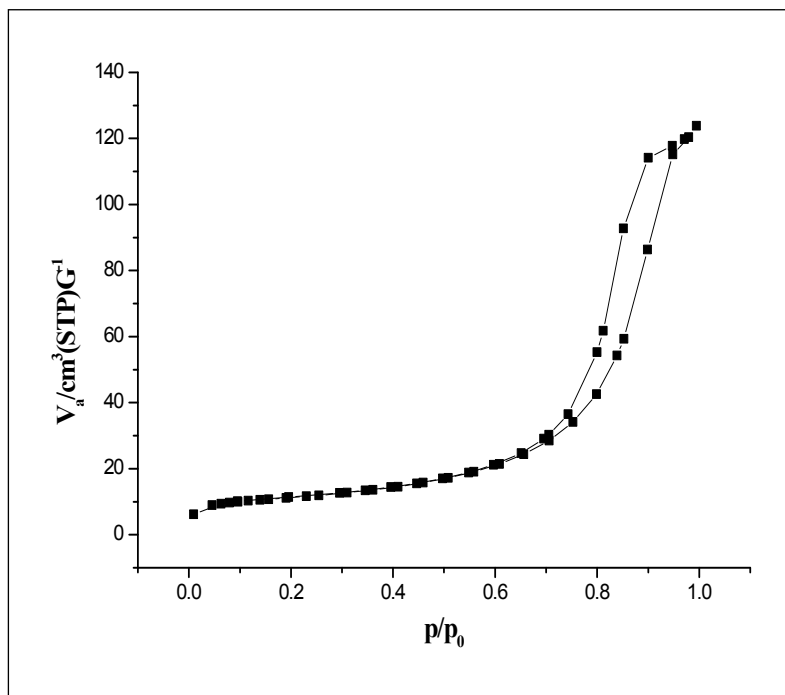

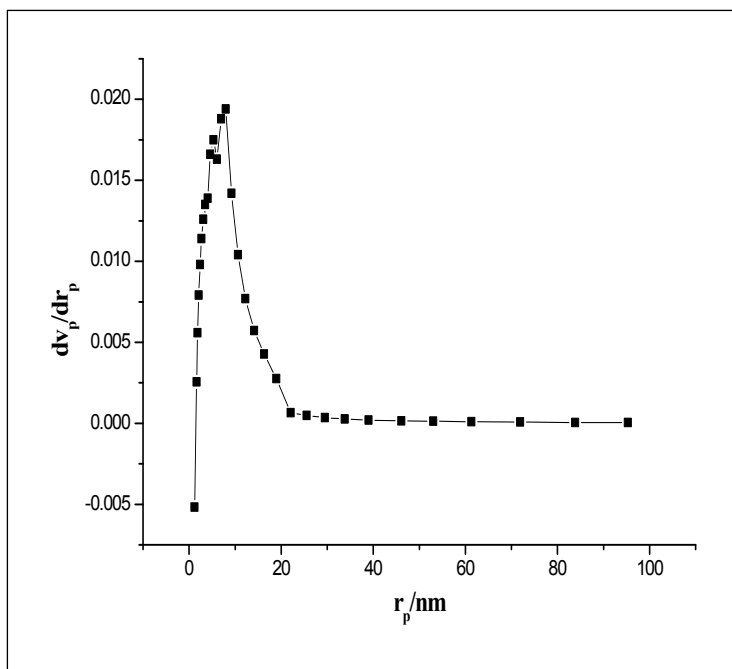

**Fig. 2S.** N<sub>2</sub> adsorption (open)/desorption (filled) isotherms at 77 K for (a) AFMNPECBs and (b) Pore size distribution of AFMNPECBs.

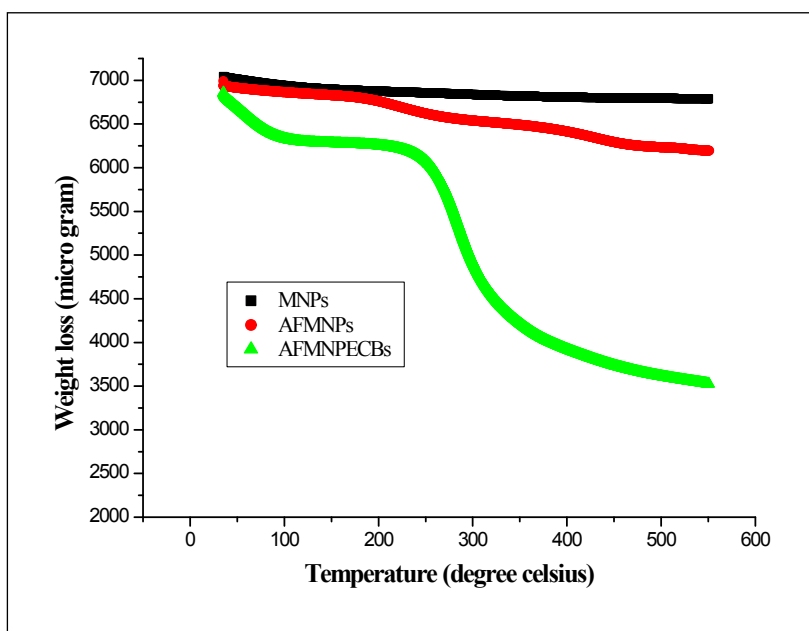

**Fig. 4S.** Thermogravimetric analysis of MNPs, AFMNPs and AFMNPECBs upto temperature range 550°C.
